# Supplementary material
Source: PubMed Central journal article supplement (PMC5790599)
Supplement: NIHMS929721-supplement-439_2017_1858_MOESM7_ESM.pdf [file NIHMS929721-supplement-439_2017_1858_MOESM7_ESM.pdf]

**Table S7** Genotypic mean HDL levels for variant hsa-miR-4727-5p/rs73295187 in the discovery and validation analysis

| Genotype | Discovery result |                    | Validation result |                    |
|----------|------------------|--------------------|-------------------|--------------------|
|          | Genotypic count  | Genotypic mean(SE) | Genotypic count   | Genotypic mean(SE) |
| CC       | 15               | 66.88(22.9)        | 22                | 66.80(23.7)        |
| AC       | 326              | 58.22(20.1)        | 347               | 54.04(16.6)        |
| AA       | 1478             | 54.66(16.9)        | 1652              | 54.27(17.5)        |

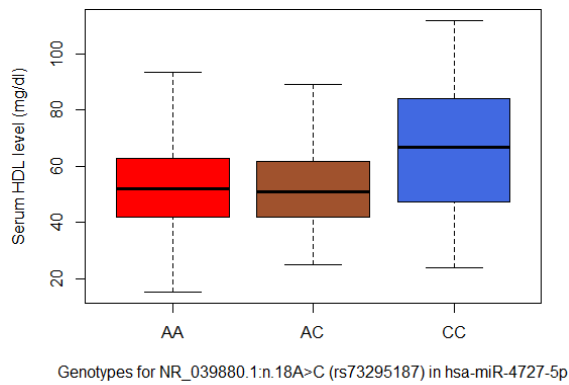

**Fig. S1** Single-variant-based association between variant hsa-miR-4727-5p/rs73295187 and HDL in the validation analysis
